# Supplementary material
Source: PubMed Central journal article supplement (PMC3127080)

Supplementary Data for

**Bacterial aptamers that selectively bind glutamine**

Tyler D. Ames<sup>1</sup> & Ronald R. Breaker<sup>1,2,3</sup>

<sup>1</sup>Department of Molecular, Cellular and Developmental Biology; <sup>2</sup>Howard Hughes Medical Institute; <sup>3</sup>Department of Molecular Biophysics and Biochemistry, Yale University, Box 208103, New Haven, CT 06520-8103, USA.

Correspondence: [ronald.breaker@yale.edu](mailto:ronald.breaker@yale.edu)

Tel: (203) 432-9389

Fax: (203) 432-0753

**Figure S1.** The 67 *glnA* RNA binds D-glutamine. **(A)** In-line probing analysis of the 67 *glnA* RNA with various concentrations of D-glutamine, ranging from 100  $\mu$ M to 10 mM. Other annotations are as described for Figure 2B. **(B)** Plot of normalized fraction of band modulation versus the logarithm of the concentration of D-glutamine. The solid line is a hypothetical binding curve for a standard one-to-one interaction with a  $K_D$  of 7 mM. Data points were derived from the numbered regions in (A).

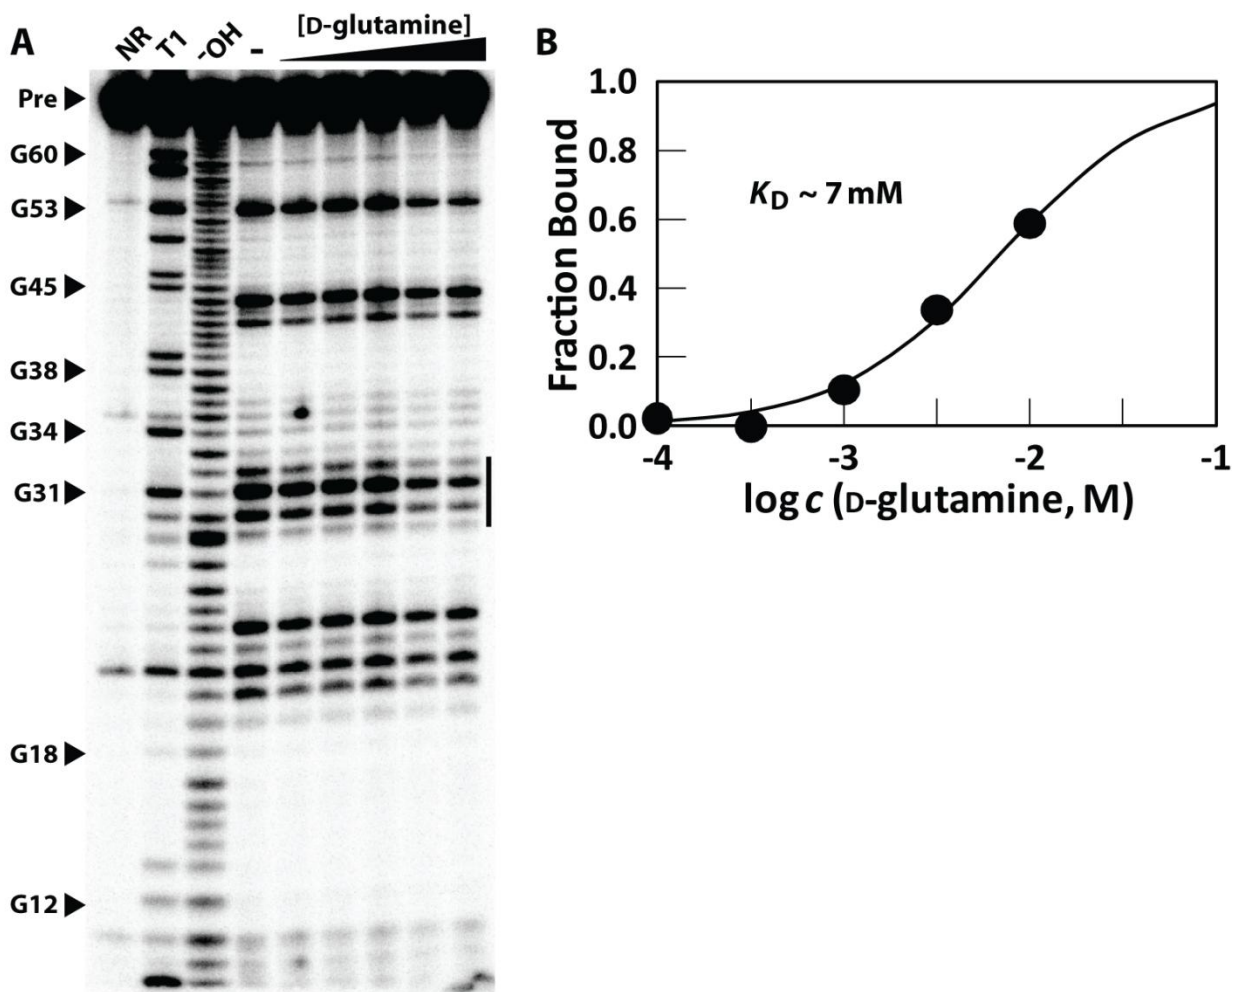

**Figure S2.** Disruptive mutations to the 67 *glnA* secondary structure interfere with binding L-glutamine, while compensatory mutations restore binding. **(A-D)** In-line probing analyses for RNA constructs M1, M2, M3, and M4 respectively. Lane annotations are similar to those used in Figure 2B. Concentrations of L-glutamine used in the in-line reactions ranged from 1  $\mu$ M to 10 mM. **(E-F)** Plots of the logarithm of L-glutamine concentration versus fraction of RNA bound for the M3 and M4 RNAs. Points on the graphs were obtained from the gel regions in B and D labeled with numbered vertical lines. The solid lines on the plots show hypothetical binding curves for standard one-to-one interactions using the  $K_D$  values shown on the graphs.

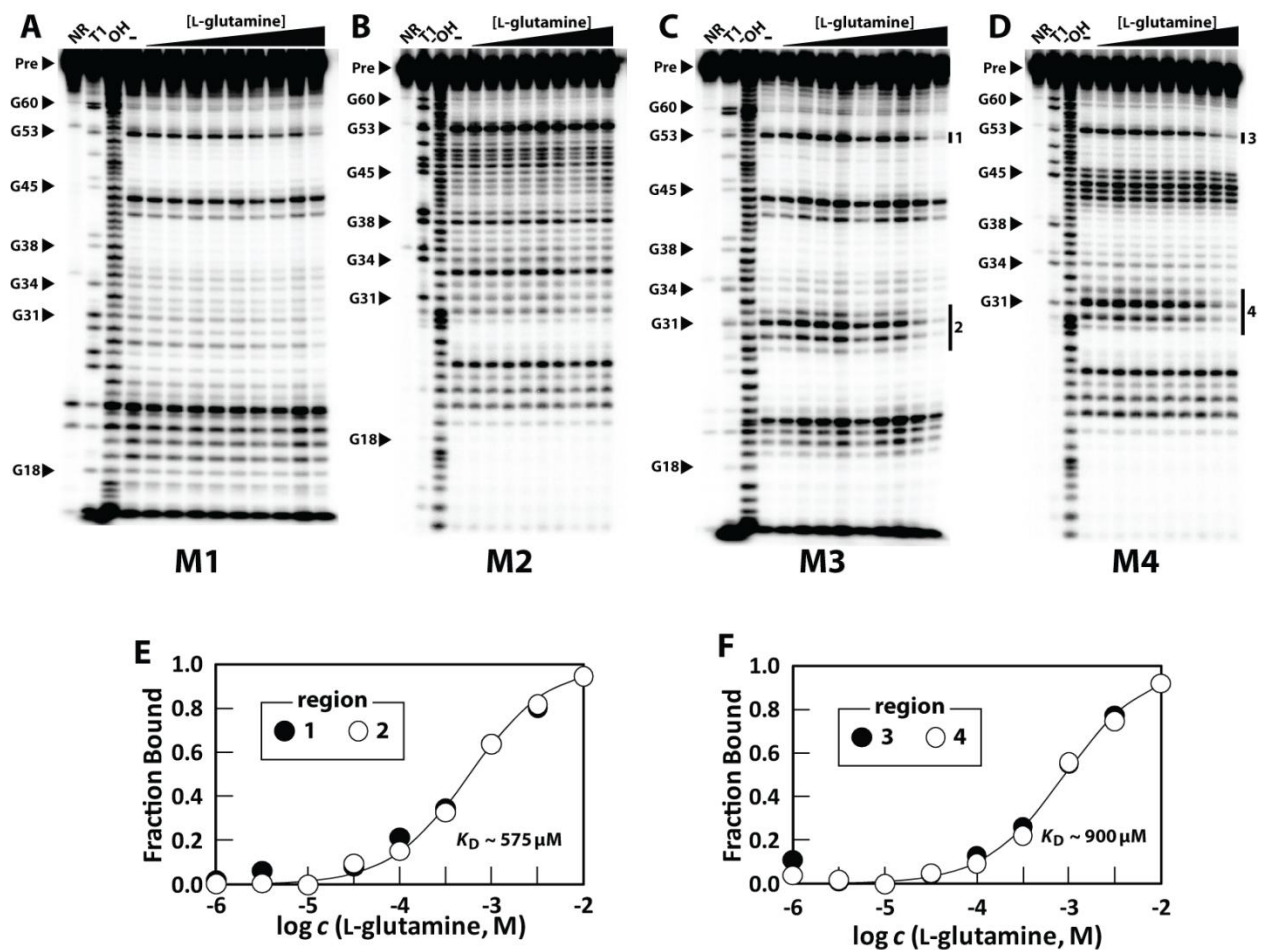

**Figure S3.** The 67 *glnA* RNA does not bind L-glutamate. In-line probing analysis of the 67 *glnA* RNA with L-glutamate. Annotations for the first four lanes are the same as those on Figure 2B. L-gln designates an in-line probing reaction where 10 mM L-glutamine was added, and L-glu designates a reaction containing 100 mM L-glutamate. Note that in reactions containing L-glutamate the buffer conditions were modified from the standard in-line probing conditions. See the materials and methods section in the main text for details.

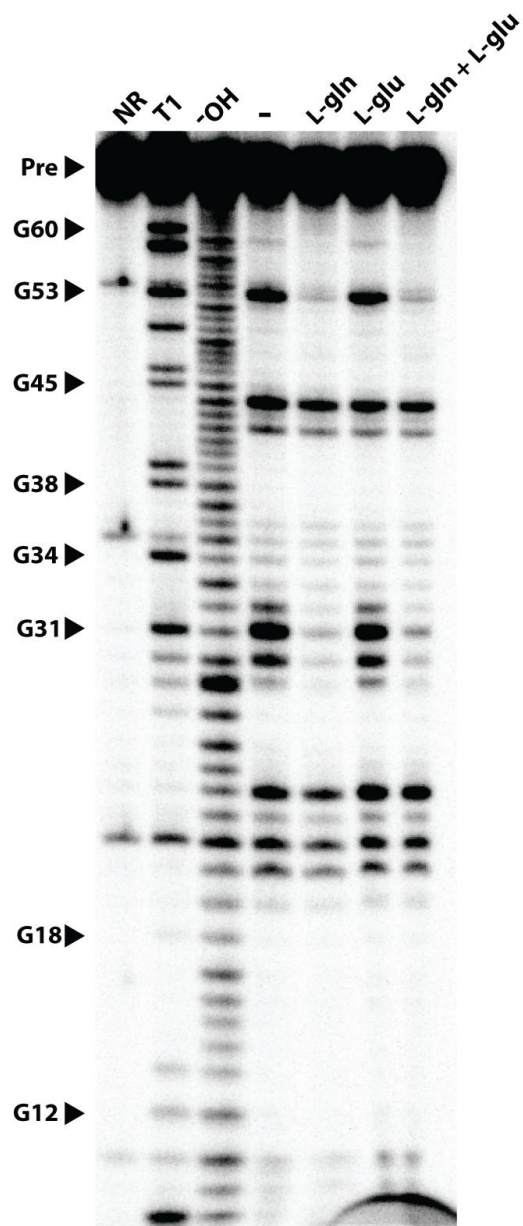

**Figure S4.** The 83 DP RNA rejects a variety of L-glutamine analogs. In-line probing analysis of the 83 DP RNA with a variety of compounds. Lane annotations are similar to those used in Figure 3A, with the addition of the dark wedge representing lanes where the RNA was tested with D-glutamine, using concentrations ranging from 100  $\mu$ M to 10 mM.

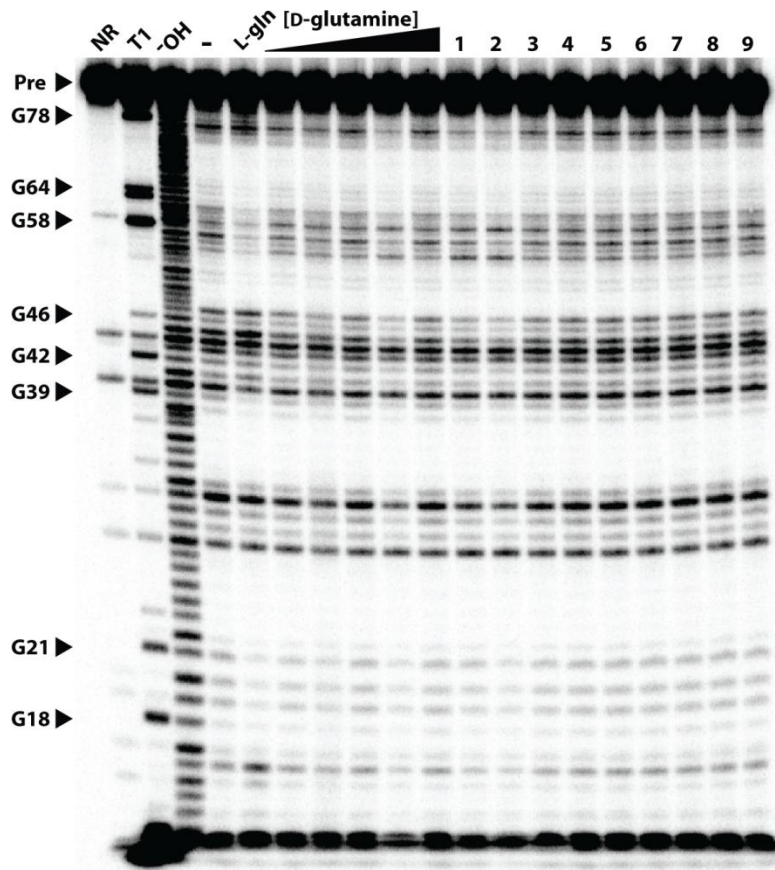

**Figure S5.** Mismatch mutations in the predicted pseudoknot of the 83 DP RNA interfere with ligand binding. **(A, B)** In-line gels testing RNAs M5 and M6 with L-glutamine. Concentrations of ligand used ranged from 10  $\mu$ M to 10 mM. Numbered arrows indicate bands quantified and plotted in C. Other lane annotations are similar to those for Figure 2B. **(C)** Plot of the normalized band modulation versus the log of the concentration of L-glutamine. The solid line shows a hypothetical  $K_D$  curve for a standard one-to-one interaction with a disassociation constant of 3 mM.

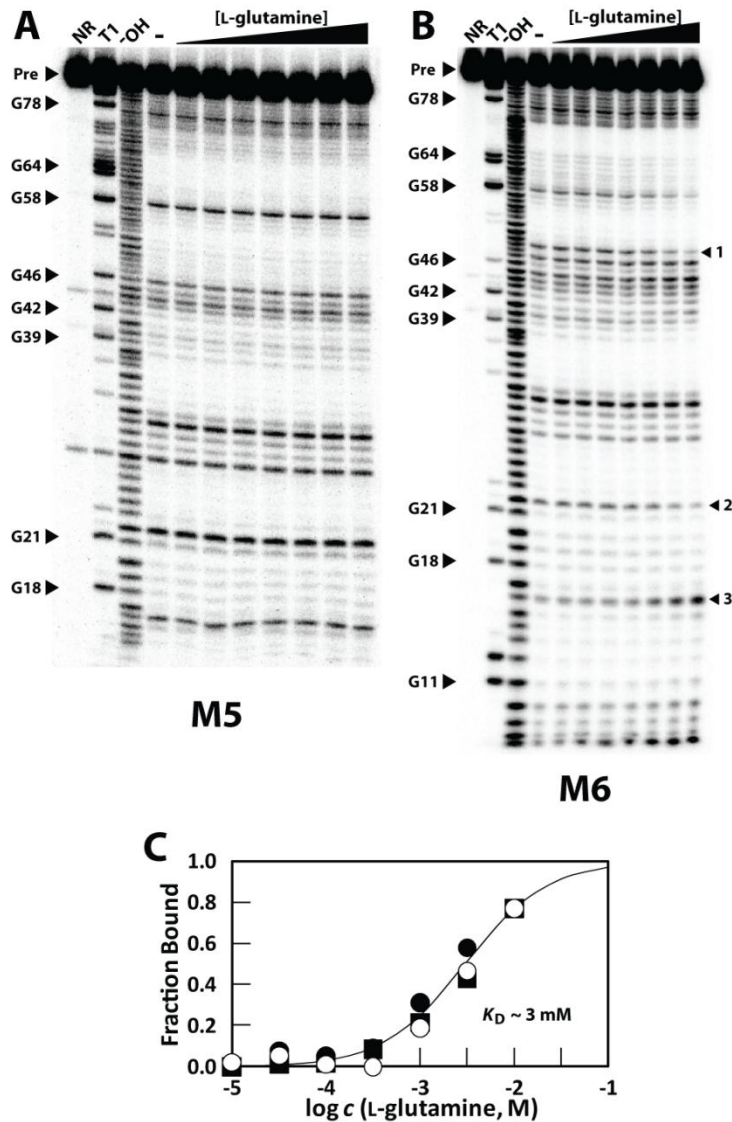

Supplement: rna0801_0082SD1.pdf [file rna0801_0082SD1.pdf]
